# Supplementary material for: A lactam-functionalized copper bent diisophthalate framework displaying significantly enhanced adsorption of CO2 and C2H2 over CH4
Source: Royal Society of Chemistry journal article supplement (doi:10.1039/c9dt01778j), 2019-01-01
Supplement: c9dt01778j1.pdf [file c9dt01778j1.pdf]

**A lactam-functionalized copper bent diisophthalate framework displaying significantly enhanced adsorption of CO<sub>2</sub> and C<sub>2</sub>H<sub>2</sub> over CH<sub>4</sub>**

Minghui He<sup>#</sup>, Fengjie Xia<sup>#</sup>, Tingting Xu, Xiaoxia Gao, Zhenzhen Jiang, Xia Wang and Yabing He\*

Key Laboratory of the Ministry of Education for Advanced Catalysis Materials, College of Chemistry and Life Sciences, Zhejiang Normal University, Jinhua 321004, China. E-mail: [heyabing@zjnu.cn](mailto:heyabing@zjnu.cn)

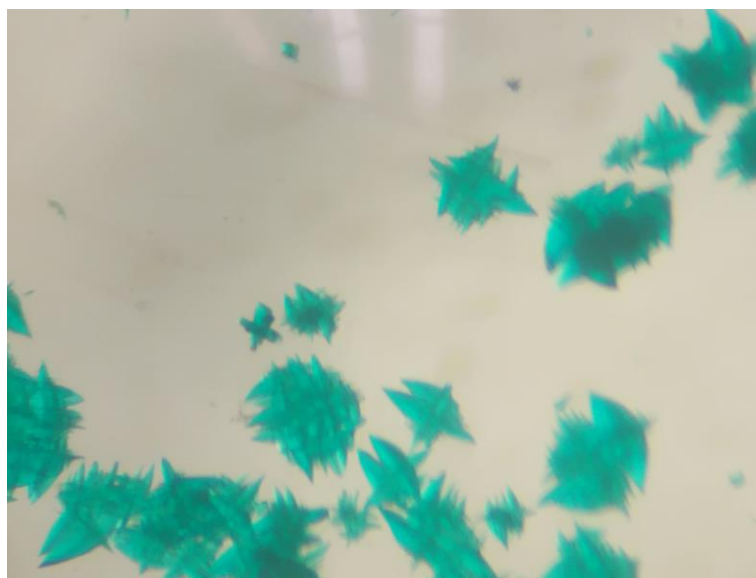

**Fig. S0** Electronic photograph of the as-synthesized **ZJNU-99**.

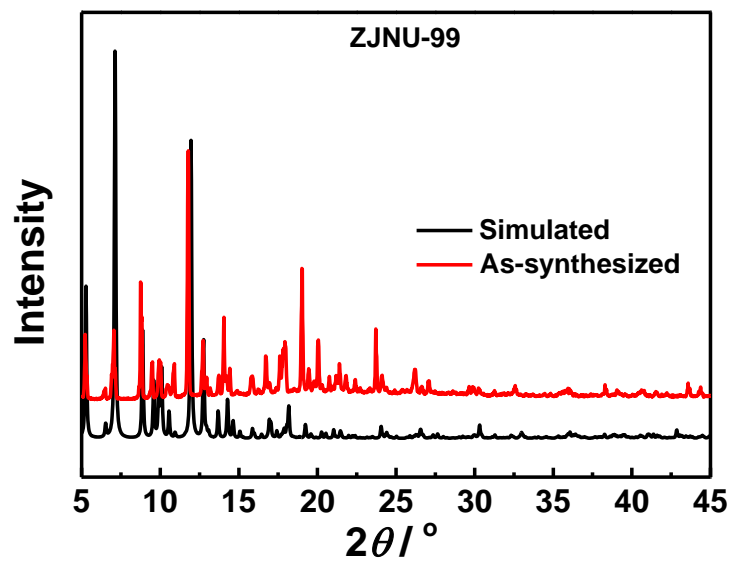

**Fig. S1** Comparison of the experimental and simulated PXRD patterns of **ZJNU-99**.

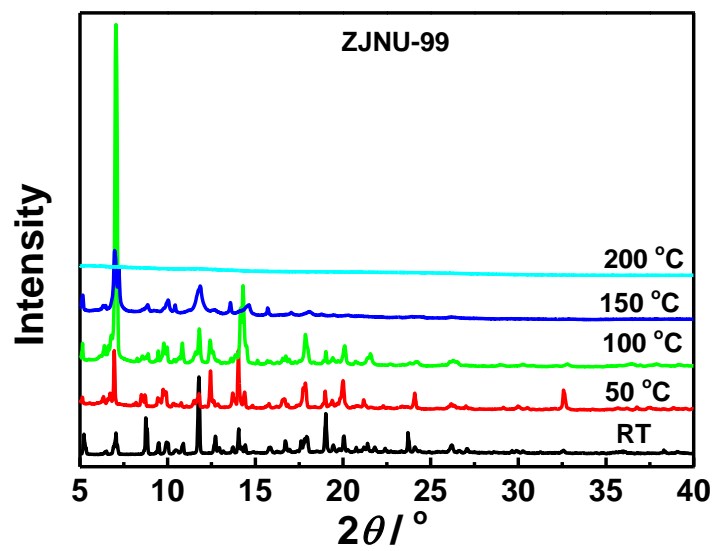

**Fig. S2** Variable-temperature PXRD patterns of the as-synthesized **ZJNU-99**.

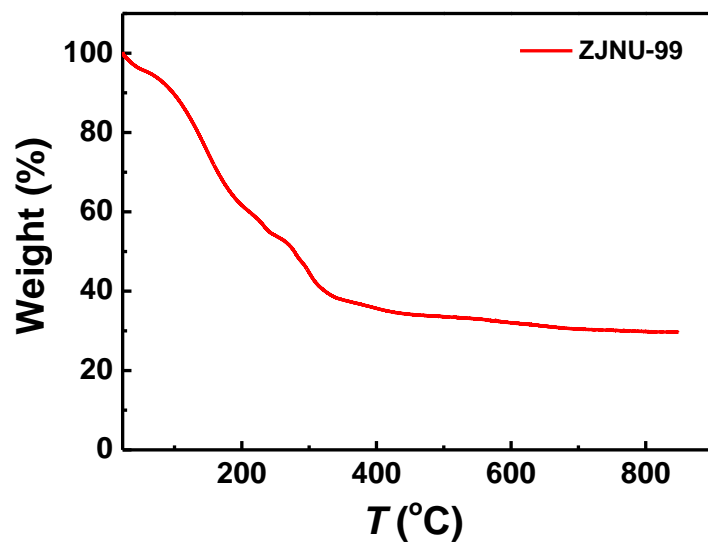

**Fig. S3** TGA curve of the as-synthesized **ZJNU-99** under a flowing nitrogen atmosphere.

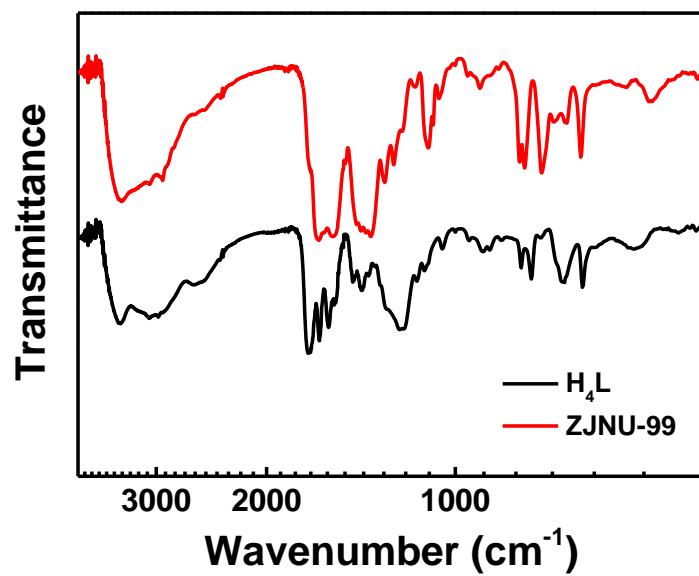

**Fig. S4** Comparison of FTIR spectra of the ligand H<sub>4</sub>L and its corresponding as-synthesized MOF ZJNU-99.

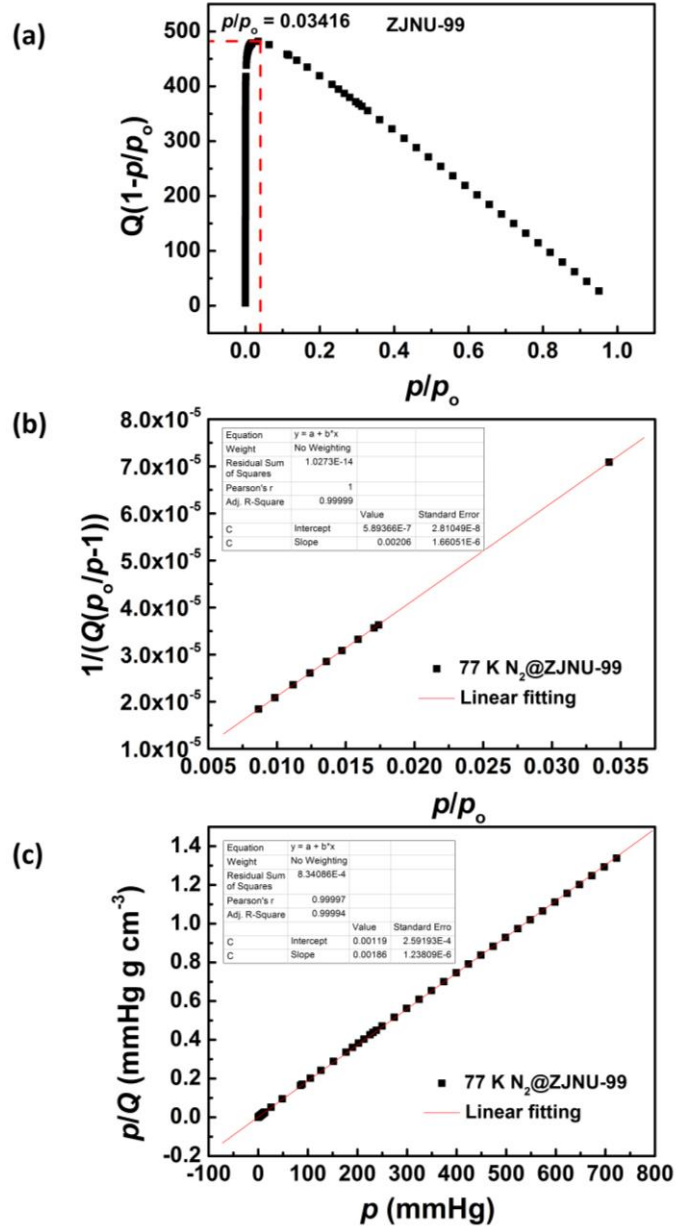

$$S_{\text{BET}} = 1/(5.89366 \times 10^{-7} + 0.00206)/22414 \times 6.023 \times 10^{23} \times 0.162 \times 10^{-18} = 2113 \text{ m}^2 \text{ g}^{-1}$$

$$S_{\text{Langmuir}} = (1/0.00186)/22414 \times 6.023 \times 10^{23} \times 0.162 \times 10^{-18} = 2340 \text{ m}^2 \text{ g}^{-1}$$

$$\text{BET constant } C = 1 + 0.00206/5.89366 \times 10^{-7} = 3496$$

$$(p/p_o)_{n_m} = \frac{1}{\sqrt{C} + 1} = 0.01663$$

**Fig. S5** The consistency plot (a), BET surface area plot (b), and Langmuir surface area plot (c) for **ZJNU-99**.

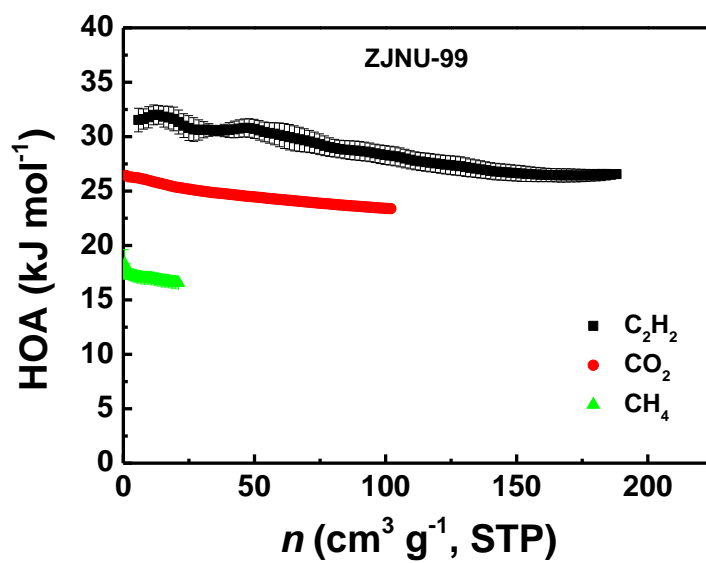

**Fig. S6** The isosteric heat of  $\text{C}_2\text{H}_2$ ,  $\text{CO}_2$ , and  $\text{CH}_4$  adsorption in **ZJNU-99** as a function of gas loadings.



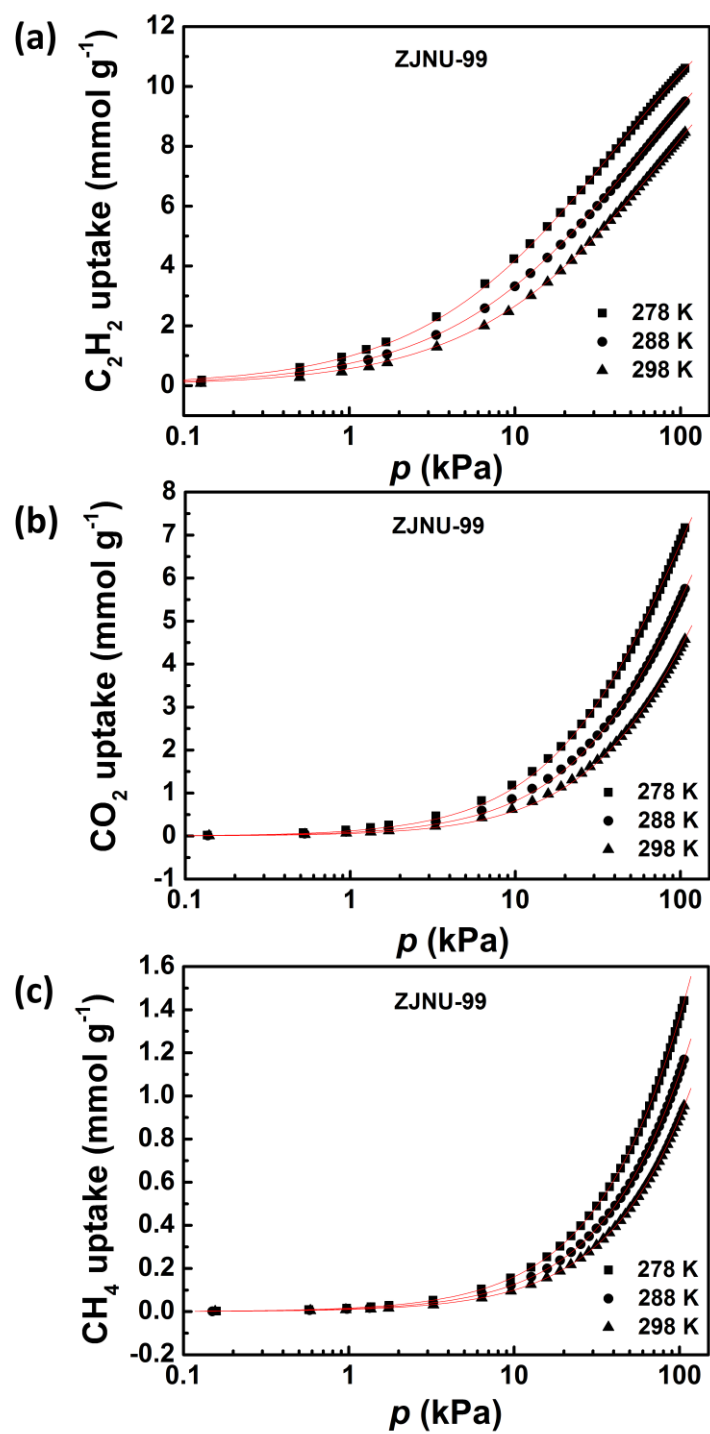

**Fig. S7** Comparison of the pure-component isotherm data for (a)  $\text{C}_2\text{H}_2$ , (b)  $\text{CO}_2$ , and (c)  $\text{CH}_4$  in **ZJNU-99** with the fitted isotherms at 278 K, 288 K, and 298 K.

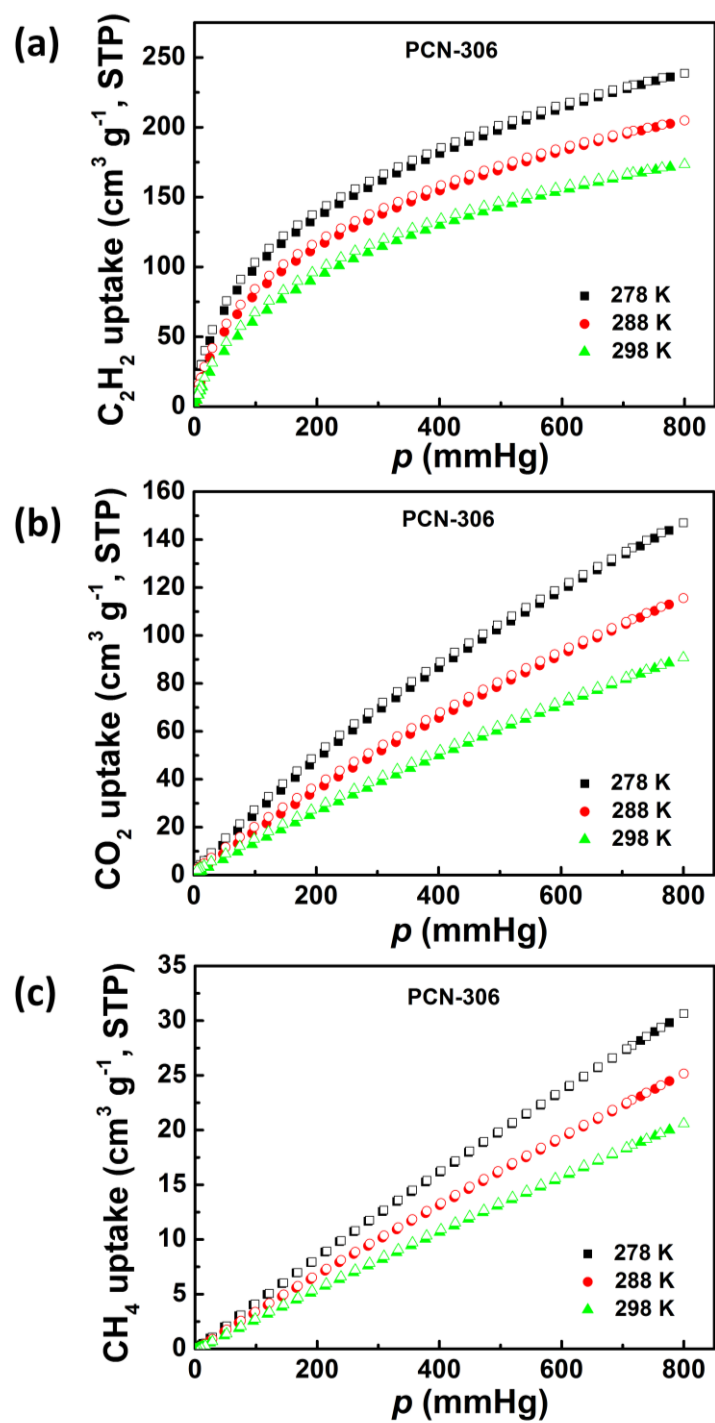

**Fig. S8** (a)  $\text{C}_2\text{H}_2$ , (b)  $\text{CO}_2$ , and (c)  $\text{CH}_4$  isotherms of **PCN-306** at 278 K, 288 K, and 298 K.

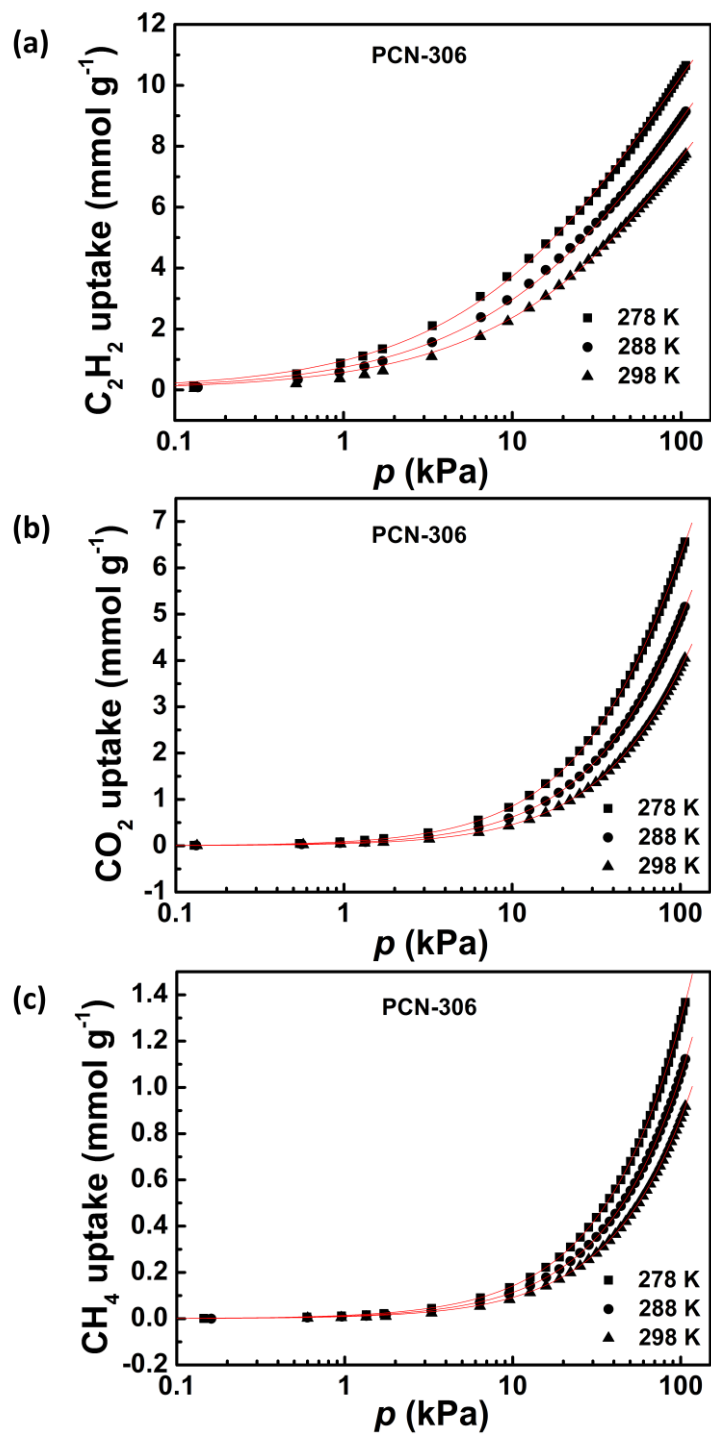

**Fig. S9** Comparison of the pure-component isotherm data for (a)  $\text{C}_2\text{H}_2$ , (b)  $\text{CO}_2$ , and (c)  $\text{CH}_4$  in **PCN-306** with the fitted isotherms at 278 K, 288 K, and 298 K.

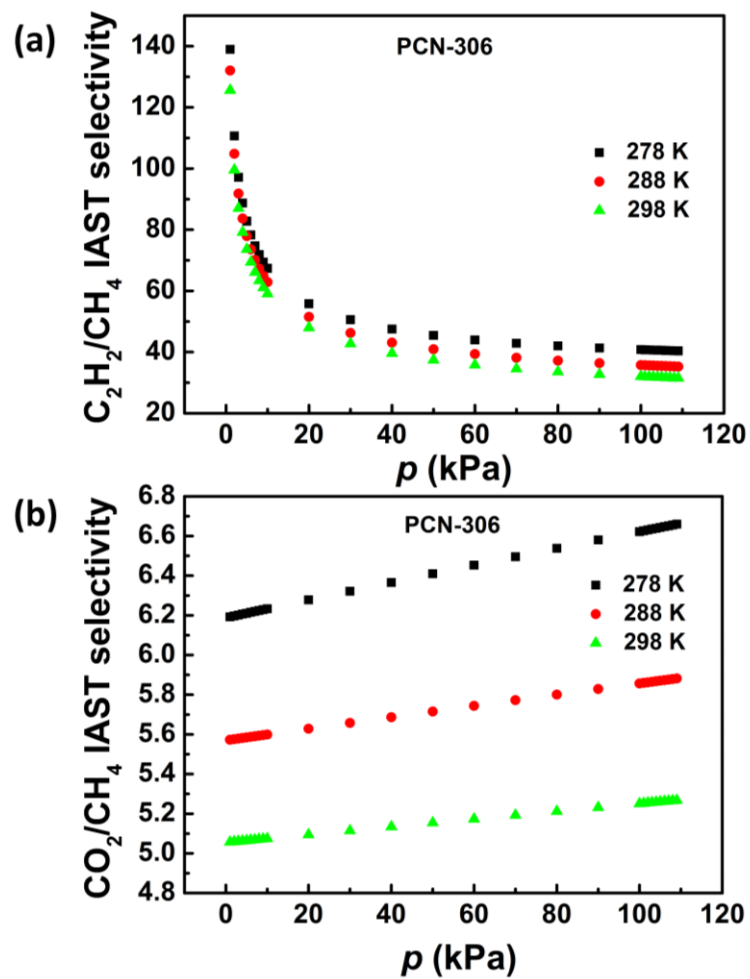

**Fig. S10** IAST selectivities for the equimolar (a) C<sub>2</sub>H<sub>2</sub>/CH<sub>4</sub> and (b) CO<sub>2</sub>/CH<sub>4</sub> gas mixtures in PCN-306 at three different temperatures of 278 K, 288 K, and 298 K.

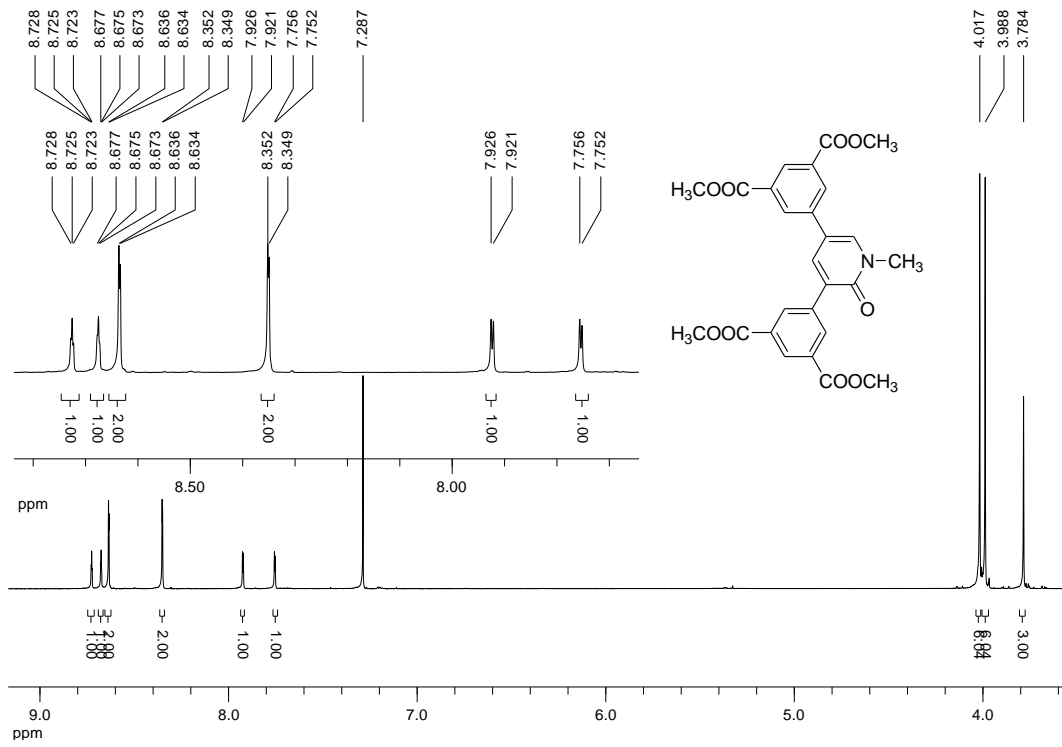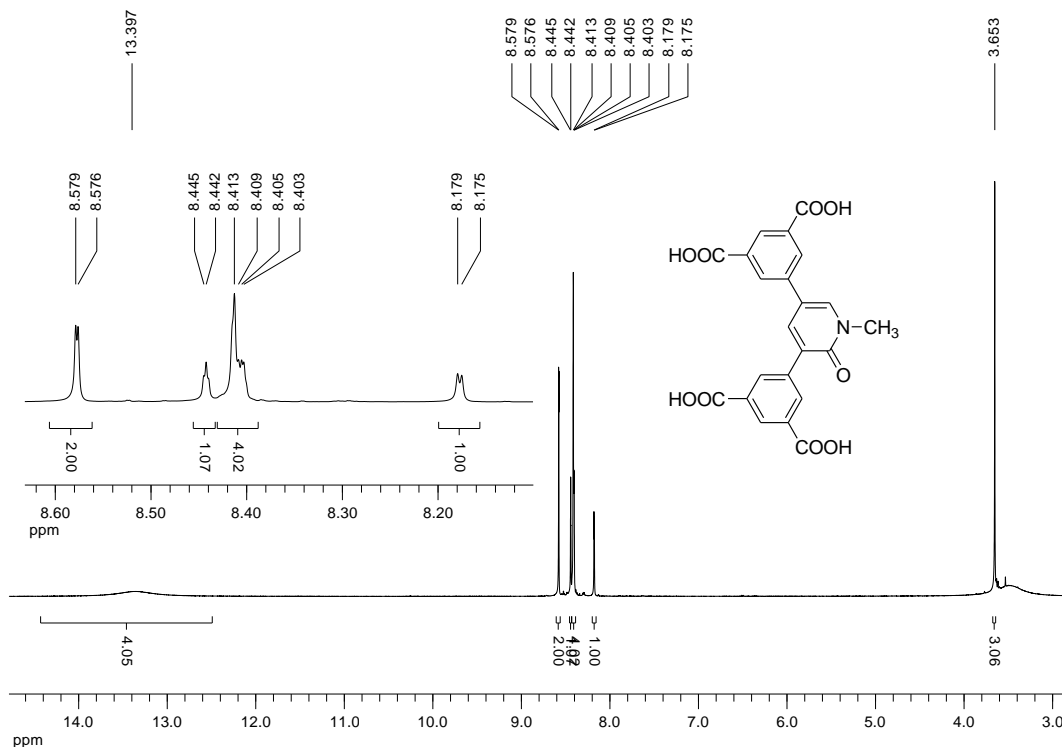

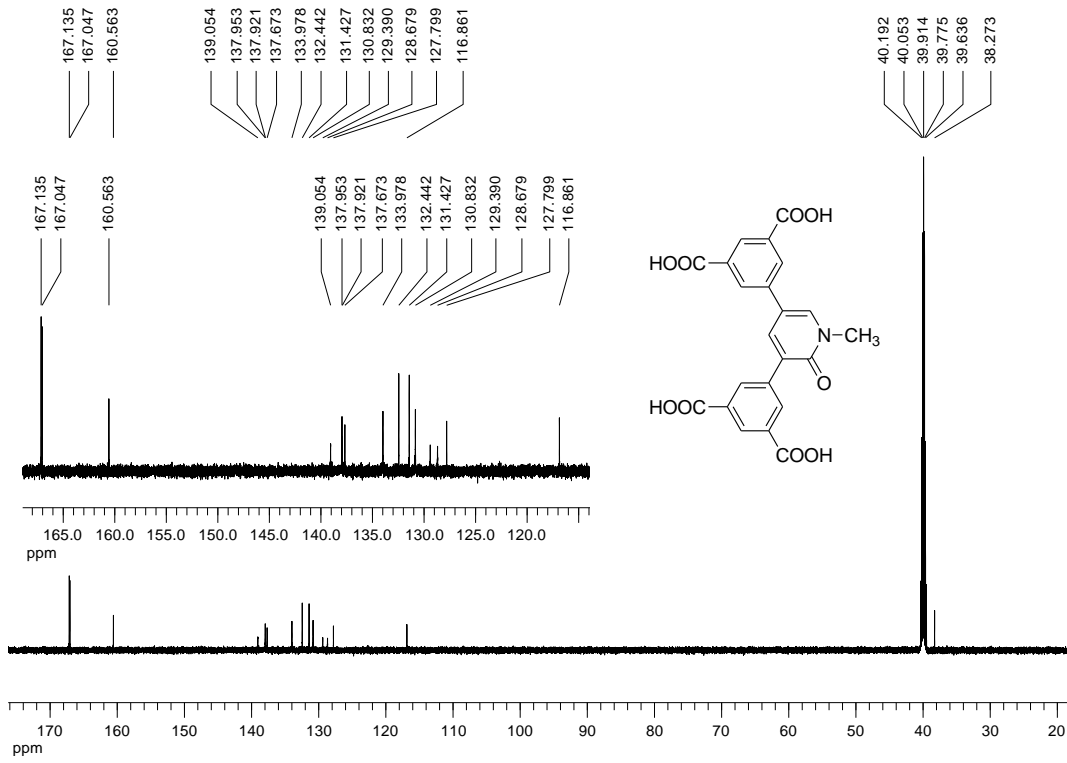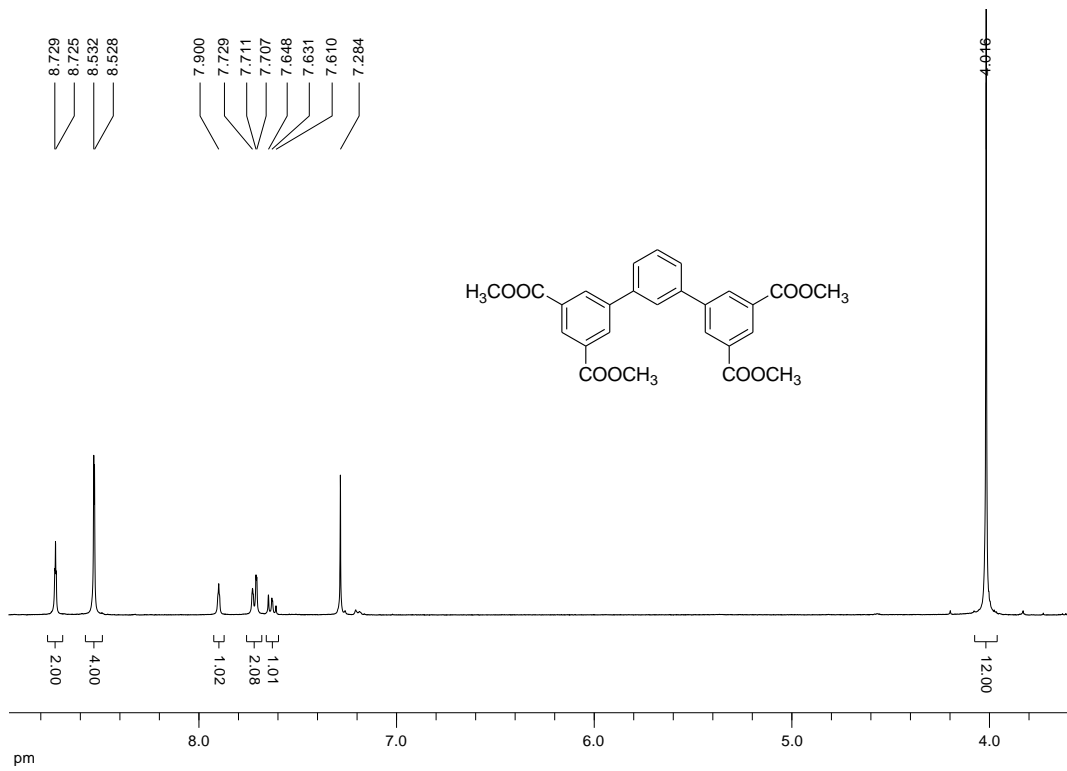

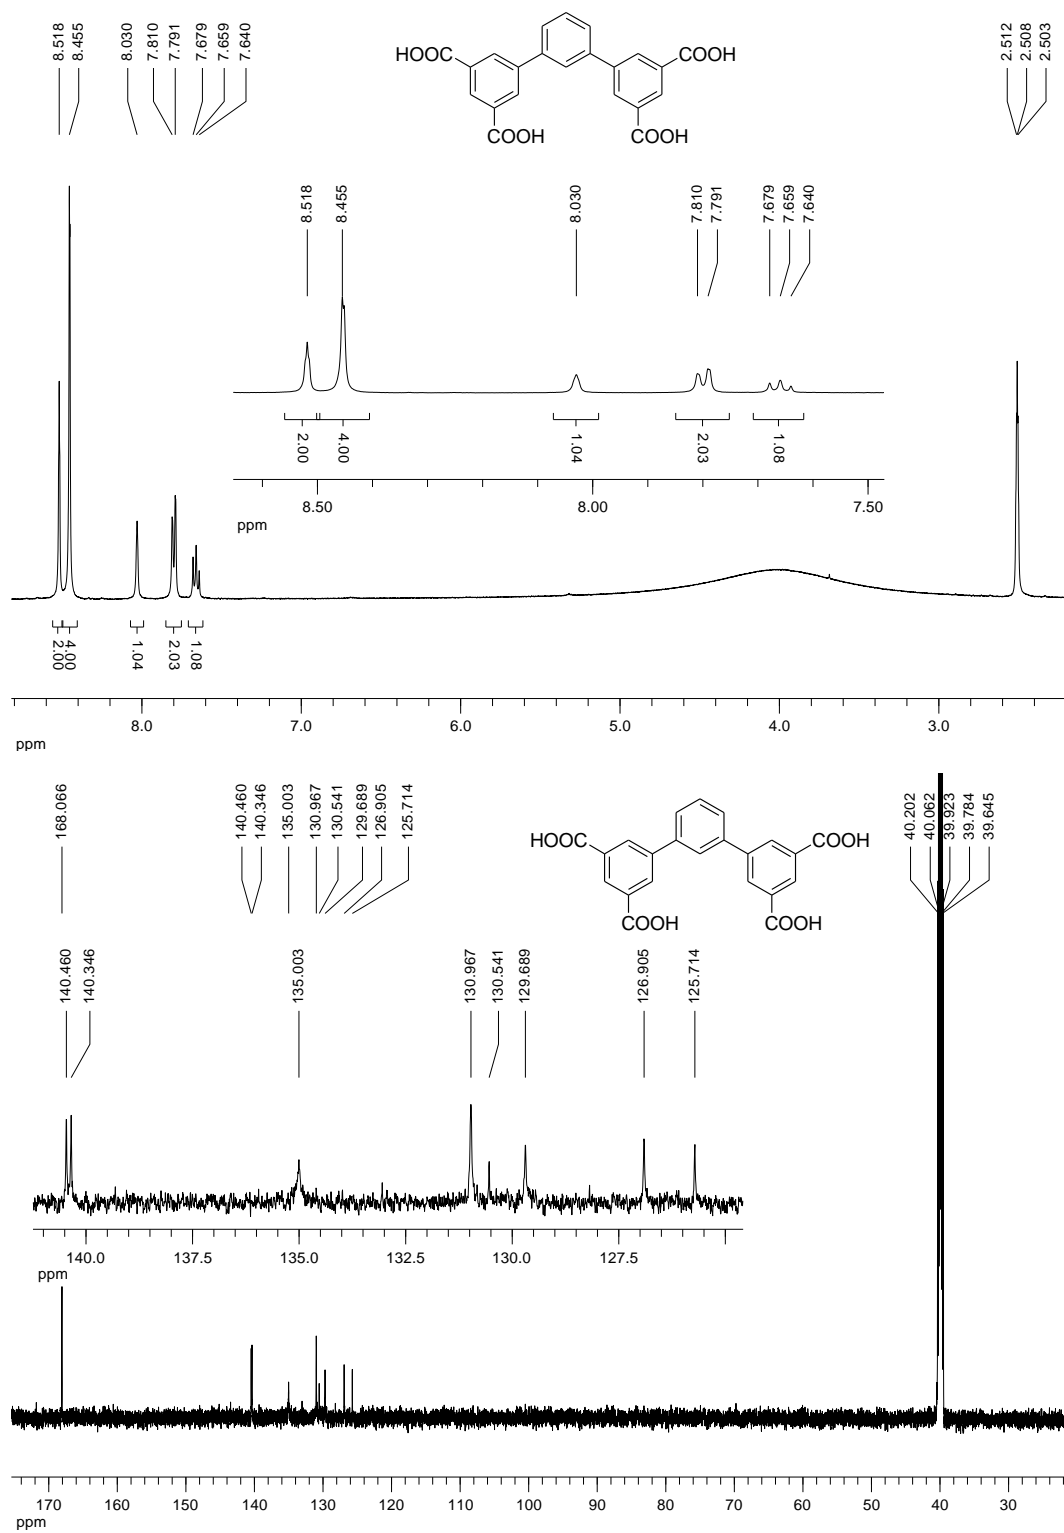

**Fig. S11** <sup>1</sup>H and <sup>13</sup>C NMR spectra.

**Table S1** Crystal data and structure refinement for **ZJNU-99**.

| MOFs                                                          | <b>ZJNU-99</b>                                                                                                                       |
|---------------------------------------------------------------|--------------------------------------------------------------------------------------------------------------------------------------|
| Empirical formula                                             | $C_{37}H_{52}Cu_2N_6O_{17}$                                                                                                          |
| Formula weight                                                | 979.92                                                                                                                               |
| $\lambda$ (Å)                                                 | 1.54178                                                                                                                              |
| Crystal system                                                | Orthorhombic                                                                                                                         |
| Space group                                                   | <i>Cmcm</i>                                                                                                                          |
| Unit cell dimensions                                          | $a = 24.7465(12)$ Å<br>$b = 33.4859(14)$ Å<br>$c = 18.4434(8)$ Å<br>$\alpha = 90^\circ$<br>$\beta = 90^\circ$<br>$\gamma = 90^\circ$ |
| $V$ (Å <sup>3</sup> )                                         | 15283.3(12)                                                                                                                          |
| $Z$                                                           | 12                                                                                                                                   |
| $D_c$ (g cm <sup>-3</sup> )                                   | 1.278                                                                                                                                |
| $\mu$ (mm <sup>-1</sup> )                                     | 1.610                                                                                                                                |
| $F(000)$                                                      | 6120                                                                                                                                 |
| $\theta$ range for data collection (°)                        | 3.267 to 65.206                                                                                                                      |
| Limiting indices                                              | $-29 \leq h \leq 27$<br>$-37 \leq k \leq 39$<br>$-19 \leq l \leq 21$                                                                 |
| Reflections collected / unique                                | 30025/6892                                                                                                                           |
| $R_{int}$                                                     | 0.0552                                                                                                                               |
| Max. and min. transmission                                    | 0.890 and 0.843                                                                                                                      |
| Refinement method                                             | Full-matrix least-squares on $F^2$                                                                                                   |
| Data/restraints/parameters                                    | 6892/3/285                                                                                                                           |
| Goodness-of-fit on $F^2$                                      | 1.079                                                                                                                                |
| Final $R$ indices [ $I > 2\sigma(I)$ ]                        | $R_1 = 0.0688$<br>$wR_2 = 0.2074$                                                                                                    |
| $R$ indices (all data)                                        | $R_1 = 0.0875$<br>$wR_2 = 0.2255$                                                                                                    |
| Largest diff. peak and hole (e <sup>-</sup> Å <sup>-3</sup> ) | 0.688 and -0.393                                                                                                                     |
| CCDC                                                          | 1907360                                                                                                                              |



**Table S2** Langmuir-Freundlich parameters for adsorption of C<sub>2</sub>H<sub>2</sub>, CO<sub>2</sub>, and CH<sub>4</sub> in ZJNU-99.

| Guest                         | $q_{\text{sat}}$<br>(mmol g <sup>-1</sup> ) | $b_0$<br>(kPa) <sup>-<math>\nu</math></sup> | $E$<br>(kJ mol <sup>-1</sup> ) | $\nu$   | $R^2$   |
|-------------------------------|---------------------------------------------|---------------------------------------------|--------------------------------|---------|---------|
| C <sub>2</sub> H <sub>2</sub> | 15.73206                                    | 1.24379 × 10 <sup>-5</sup>                  | 19.844                         | 0.73516 | 0.99988 |
| CO <sub>2</sub>               | 15.14643                                    | 2.56684 × 10 <sup>-7</sup>                  | 23.962                         | 1       | 0.99951 |
| CH <sub>4</sub>               | 7.92144                                     | 1.52239 × 10 <sup>-6</sup>                  | 16.688                         | 1       | 0.99999 |

**Table S3** Langmuir-Freundlich parameters for adsorption of C<sub>2</sub>H<sub>2</sub>, CO<sub>2</sub>, and CH<sub>4</sub> in PCN-306.

| Guest                         | $q_{\text{sat}}$<br>(mmol g <sup>-1</sup> ) | $b_0$<br>(kPa) <sup>-<math>\nu</math></sup> | $E$<br>(kJ mol <sup>-1</sup> ) | $\nu$   | $R^2$   |
|-------------------------------|---------------------------------------------|---------------------------------------------|--------------------------------|---------|---------|
| C <sub>2</sub> H <sub>2</sub> | 20.56898                                    | 1.83018 × 10 <sup>-5</sup>                  | 18.245                         | 0.65466 | 0.99922 |
| CO <sub>2</sub>               | 21.01804                                    | 2.96428 × 10 <sup>-7</sup>                  | 22.109                         | 1       | 0.99997 |
| CH <sub>4</sub>               | 13.18114                                    | 1.6832 × 10 <sup>-6</sup>                   | 14.953                         | 1       | 0.99995 |

**Table S4** Summary of gas adsorption properties of **ZJNU-99** and its parent compound **PCN-306**.

| MOFs    | $S_{\text{BET}}$<br>$S_{\text{Langmuir}}$<br>( $\text{m}^2 \text{g}^{-1}$ ) | $V_{\text{p}}$<br>( $\text{cm}^3 \text{g}^{-1}$ ) | $D_{\text{c}}$<br>( $\text{g cm}^{-3}$ ) | $\text{C}_2\text{H}_2$ uptake <sup>a</sup><br>( $\text{cm}^3 \text{g}^{-1}$ , STP) |       |       | $\text{CO}_2$ uptake <sup>a</sup><br>( $\text{cm}^3 \text{g}^{-1}$ , STP) |       |       | $\text{CH}_4$ uptake <sup>a</sup><br>( $\text{cm}^3 \text{g}^{-1}$ , STP) |       |       | $\text{C}_2\text{H}_2/\text{CH}_4$ (50/50, v/v)<br>IAST selectivity <sup>a</sup> |       |       | $\text{CO}_2/\text{CH}_4$ (50/50, v/v)<br>IAST selectivity <sup>a</sup> |       |       |
|---------|-----------------------------------------------------------------------------|---------------------------------------------------|------------------------------------------|------------------------------------------------------------------------------------|-------|-------|---------------------------------------------------------------------------|-------|-------|---------------------------------------------------------------------------|-------|-------|----------------------------------------------------------------------------------|-------|-------|-------------------------------------------------------------------------|-------|-------|
|         |                                                                             |                                                   |                                          | 298 K                                                                              | 288 K | 278 K | 298 K                                                                     | 288 K | 278 K | 298 K                                                                     | 288 K | 278 K | 298 K                                                                            | 288 K | 278 K | 298 K                                                                   | 288 K | 278 K |
| ZJNU-99 | 2113/2340                                                                   | 0.835                                             | 0.731                                    | 189.8                                                                              | 212.9 | 237.7 | 102.5                                                                     | 128.9 | 160.7 | 21.4                                                                      | 26.2  | 32.3  | 46.6                                                                             | 56.1  | 71.1  | 6.8                                                                     | 7.8   | 9.2   |
| PCN-306 | 2825/3087                                                                   | 1.101                                             | 0.690                                    | 173.5                                                                              | 204.9 | 238.7 | 90.8                                                                      | 115.6 | 147.0 | 20.6                                                                      | 25.2  | 30.6  | 31.5                                                                             | 35.3  | 40.4  | 5.3                                                                     | 5.9   | 6.7   |

$S_{\text{BET}}/S_{\text{Langmuir}}$  = BET and Langmuir surface areas;  $V_{\text{p}}$  = Pore volume based on 77 K  $\text{N}_2$  isotherm;  $D_{\text{c}}$  = Framework density calculated from single-crystal X-ray data; <sup>a</sup> at 1 atm.
